1 **Lifelong temporal dynamics of the gut microbiome associated with longevity in mice**

2

3 Lena Takayasu<sup>1, 2</sup>, Eiichiro Watanabe<sup>2</sup>, Taichi Umeyama<sup>2</sup>, Rina Kurokawa<sup>2, 3</sup>, Yusuke Ogata<sup>2</sup>, Yuya  
4 Kiguchi<sup>2, 3</sup>, Hiroaki Masuoka<sup>2</sup>, Masahiro Umezaki<sup>1</sup>, Masahira Hattori<sup>\*2, 3</sup>, and Wataru Suda<sup>\*2</sup>

5

6 <sup>1</sup> Department of Human ecology, Graduate School of Medicine, The University of Tokyo. 7-3-1,  
7 Hongo, Bunkyo-ku, Tokyo 113-0033 Japan

8 <sup>2</sup> Laboratory for Microbiome Sciences, IMS, RIKEN. 1-7-22 Suehiro-cho Tsurumi-ku, Yokohama,  
9 Kanagawa 230-0045 Japan

10 <sup>3</sup> Cooperative Major in Advanced Health Science, Graduate School of Advanced Science and  
11 Engineering, Waseda University. 3-4-1 Okubo Shinjuku-ku, Tokyo 169-8555 Japan

12

13 \* Corresponding authors:

14 Wataru Suda

15 Tel.: +81-45-503-9302

16 E-mail: [wataru.suda@riken.jp](mailto:wataru.suda@riken.jp)

17

## 18 **Abstract**

19 The effect of lifelong dynamics on host longevity of the gut microbiome is largely unknown. Herein,  
20 we analyzed the longitudinal fecal samples of seven sibling mice across their lifespan from birth to  
21 natural death, spanning over 1,000 days of age, and maintained them under controlled environmental  
22 and dietary conditions. Our 16S-rRNA sequencing analysis revealed 38 common “life-core” bacterial  
23 species/OTUs (operational taxonomic units) detected in  $\geq 80\%$  of all samples collected across the  
24 lifespan of individual mice. Despite the shared genetic background and dietary habits, the gut  
25 microbiome structure significantly diversified with age and among individuals. We found a strong  
26 positive correlation between longevity and the alpha diversity in middle age (500-700 days) and  
27 negative correlation in old age (>800 days). Furthermore, host longevity was significantly associated  
28 with the abundance of 17 bacterial species/OTUs, most of which were “life-core” species. Our data  
29 suggest that temporal dynamics of the gut microbiome are strongly linked to host longevity.

30

31

## 32 **Introduction**

33 It has long been hypothesized that the gut microbiome affects the longevity and aging of hosts. In  
34 studies using germ-free animals show longer lifespans than conventional animals<sup>1</sup>, and the  
35 administration of antibiotics in mice and insects extends the lifespan of mice<sup>2,3</sup>. In addition to  
36 sterilization, fecal microbiota transplantation from wild-type mice into progeroid mice has been  
37 reported to enhance both the health and lifespan of mice<sup>4</sup>. Moreover, the administration of the probiotic  
38 bacterium *Bifidobacterium animalis* or *Akkermansia muciniphila* has been shown to extend the  
39 lifespan of mice<sup>4-6</sup>. Low-calorie diets are also associated with a prolonged life span in many biological  
40 species<sup>7-9</sup>, including worms, flies, mice, and rats, and the underlying mechanism of this effect was  
41 recently reported to be associated with the gut microbiome<sup>10</sup>. These studies directly suggest that the  
42 gut microbiome is involved in the prolongation of lifespan; however, it remains unclear how structural  
43 variations in the gut microbiome play a role in the prolongation of lifespan.

44 In the last decade, culture-independent metagenomics with advanced sequencing  
45 technologies have allowed the investigation of differences in the structure of the gut microbiome at  
46 different life stages, from infancy to the elderly<sup>11-18</sup>. Most of these metagenome-based human cohort  
47 studies have shown covariance of age with the gut microbiome by comparing gut microbiomes  
48 between different age groups. However, these approaches do not accurately determine whether the  
49 age-associated differences in gut microbiomes are primarily associated with chronological age or  
50 confounded by other factors such as lifestyles because individuals in different age groups might have  
51 been exposed to different environmental and lifestyle events. In addition, patient history, including  
52 medications and a history of gut microbial colonization, may also affect the gut microbiome of humans  
53 throughout life. In contrast, mice have a lifetime of two-three years, enabling the monitoring of time

54 series variations in the gut microbiome over a lifetime. Therefore, the present study aimed to clarify  
55 the intimate transition in the gut microbiome with age using mice instead of humans. We analyzed  
56 fecal samples longitudinally collected from siblings of specific pathogen-free (SPF) mice throughout  
57 their whole life from birth to death, spanning more than 1,000 days, to elucidate the association of gut  
58 microbiomes with the lifespan of hosts and life events, including pregnancy, delivery, and cohousing,  
59 under the same rearing environments.

60

## 61 **Results**

62 **Mice, collection of fecal samples, and 16S rRNA gene analysis.** We purchased and bred the parent  
63 mice (Mo and Fa, SPF C57BL/6J strain), which thereafter had nonuplet mice (one male, seven females,  
64 and one unknown) at the animal facility. Of these siblings, seven mice (M1, 2, 3, 4, 5, 7, and 8) died  
65 of natural causes with a mean lifetime of  $922.7 \pm 71.6$  days ranging from 827 to 1,044 days, one mouse  
66 (M6) died with a shorter lifespan than the others at 524 days probably due to the development of a  
67 tumor under the same controlled environmental, and one mouse (M9) died immediately after birth.

68 Throughout the experiment, the eight siblings were cohoused with their parents for 51 days  
69 after birth, and thereafter cohoused with different combinations of individuals in different cages, and  
70 three (M3, M7, and M8) and Mo experienced pregnancy and delivery (Table S1). We performed  
71 immediate autopsies of the dead mice and observed tumors in five mice (M2, 6, 7, 8, and Mo) but not  
72 in others (M1, 3, 4, 5, and Fa).

73 We longitudinally collected a total of 1,815 fecal samples from 10 mice (eight siblings and  
74 parents) with an average sampling interval of 4.3 days and obtained a total of 18.0 million high-quality  
75 reads of the 16S rRNA gene V1-2 region from fecal DNA samples using the Illumina MiSeq platform  
76 (Table S1, Methods). Clustering of 16S reads from samples of the seven siblings with natural death  
77 with 97% identity individually generated operational taxonomic units (OTUs) ranging from 4,094 to  
78 6,984 OTUs (5,646 OTUs on average), of which 11 to 17% (13% on average) were OTUs with  $\geq 0.1\%$   
79 abundance in at least one sample of each mouse. In addition, clustering of 16S reads from all samples  
80 of the 10 mice (eight siblings and parents) generated a total of 21,768 OTUs, including 6,531 OTUs  
81 with  $\geq 0.1\%$  abundance in at least one sample, which was used for analysis with common OTU IDs in  
82 this study (Table S1).

83

84 **Temporal variations in  $\alpha$ -diversity across a lifetime.** Analysis of the cumulative number of OTUs  
85 with  $\geq 0.1\%$  abundance in at least one sample over a lifetime of 200 days after birth revealed that over  
86 50 and 90% of the total OTUs appeared within 28 and 167 days in the samples of the seven siblings,  
87 respectively (Extended Data Fig. 1). The number of OTUs rapidly increased to 200–300 in the first  
88 20 days, although 9–15 OTUs were detected in 0-day samples of four mice (M2, 3, 6, and 8), and were  
89 relatively constant after 100 days in most mice (Extended Data Fig. 2). The number of OTUs in the

90 bins of four mice (M3, 5, 7, and 8) was relatively constant across the lifetime after 100 days compared  
91 to that of the others (M1, 2, and 4), which tended to have a lower number of OTUs in the latter half of  
92 the lifespan of mice. We observed an increase in the number of OTUs in the last two bins just before  
93 death in six out of seven mice, and four of them were significantly increased (Student's t-test,  $P < 0.05$ ).

94

95 **Temporal variations in  $\beta$ -diversity across a lifetime.** The principal coordinate analysis (PCoA) of  
96 weighted and unweighted UniFrac distances of all samples across the lifetime of the seven siblings  
97 revealed that the most prominent difference in  $\beta$ -diversity across samples was that in samples before  
98 and after 20 days (Figs. 1A and B), consistent with the change in the number of OTUs in the early  
99 lifetime shown in Extended Data Fig. 2. The data also showed significant differences in gut  
100 microbiome composition between the individuals after 20 days (permutational multivariate analysis  
101 of variance [PERMANOVA]  $P < 0.05$ ; Figs. 1C and D), suggesting a high inter-individual diversity  
102 in gut microbiomes between the seven siblings even under the same rearing environments.

103

104 **Variations in the relative abundance of OTUs across a lifetime.** We found nine distinct dynamic  
105 patterns (clusters) in the relative abundance of OTUs ( $>0.1\%$  abundance) across lifetimes in the seven  
106 siblings, based on the Silhouette index calculation (Figs. 2 and Extended Data Fig. 3). Clusters\_1 and  
107 4 contained OTUs with a relatively high appearance frequency and constantly high abundance  
108 throughout most of their lifetime. Cluster\_2 contained OTUs with two transient peaks in both early  
109 and late lifetimes. Cluster\_3 contained OTUs detected immediately after birth, and almost disappeared  
110 in the latter lifetime. Cluster\_5 contained OTUs with the highest abundance in the first half of the  
111 latter half of life, whereas Cluster\_6 contained OTUs with higher abundance in the latter half of the  
112 first half of life. Cluster\_7 contained OTUs with a transient peak in early age and a slight increase in  
113 late age. Cluster\_8 contained OTUs with two transient peaks in the early ( $\sim 50$  days) and middle  
114 lifetimes ( $\sim 500$  days), with a relatively lower abundance in the latter half of the first half of the lifetime.  
115 Cluster\_9 contained OTUs that transiently increased only at the early lifetime, which was limited to  
116 one mouse (M3). For the transient OTUs in the early lifetime, OTUs in Clusters\_2, 4, 5, 7, and 9  
117 increased after the earliest OTUs in Cluster\_3 appeared (Extended Data Fig. 4).

118

119 **Life-core and transient OTUs/species across a lifetime.** Histograms of the number of OTUs ( $\geq 0.1\%$   
120 abundance in at least one sample) along the appearance frequency showed a bimodal distribution in  
121 all samples of the seven siblings (Fig. 3A). We then defined OTUs detected in  $>80\%$  and  $<20\%$  of all  
122 samples from each mouse as “life-core” and “transient” OTUs, respectively. We found 74 non-  
123 redundant life-core OTUs (varying from 48 to 60 in seven siblings), of which 38 (minimum life-core  
124 OTUs, 51%) were common in all mice and belonged to Clusters\_1 and/or 4, and seven (9.5%) were  
125 specific to individuals (Table S2). In contrast, 989 non-redundant transient OTUs (varying from 317

126 to 448 in seven siblings) were found in the samples and included only six (0.6%) common OTUs  
127 belonging to Clusters\_2, 3, and 5, and 394 (39.8%) were specific to individuals (Table S3). Taxonomic  
128 assignment revealed that all life-core OTUs belonged to the four major phyla of the gut microbiome,  
129 of which 52 (70%) and 31 (82%) were assigned to Bacteroidetes in the core and minimum life-core  
130 OTUs, respectively. In contrast, the transient OTUs belonged to more than nine phyla, of which 816  
131 (83%) were assigned to Firmicutes (Fig. 3B). In addition, life-core OTUs had a relatively high  
132 abundance compared to transient OTUs (Extended Data Fig. 5).

133

134 **Correlation of alpha diversity with the lifespan of the host.** As the seven siblings had different  
135 lifespans ranging from 832 to 1,049 days under the same rearing environments (Table S1), we explored  
136 the correlation between gut microbiome structure and their lifespans. To this end, we developed a  
137 method to identify and assess microbial variables correlated with lifespan, based on Spearman's  
138 correlation coefficient (Extended Data Fig. 6, see Methods). The analysis revealed strong correlations  
139 between lifespan and  $\alpha$ -diversity indices (OTU#, Shannon's index) in samples at certain ages  
140 (Extended Data Fig. 7): significant positive correlations with the indices at ages from 500 to 700 days,  
141 and significant negative correlations with the indices at ages after 800 days.

142

143 **Correlation of OTU abundance with the lifespan of the host.** Using the same method, we also  
144 found that 17 OTUs in samples at certain ages were significantly correlated in abundance with lifespan  
145 (Fig. 4). Seven OTUs (OTU00012, OTU00013, OTU00028, OTU00035, OTU00037, OTU00055, and  
146 OTU00105) were negatively correlated in abundance with late age (late period of the lifetime, after  
147 800 days); two OTUs (OTU00006 and OTU00076) were positively correlated in abundance with  
148 middle age (middle period of the lifetime, from 100 to 600 days) and negatively correlated with late  
149 age; two OTUs (OTU00041 and OTU01676) were positively correlated in abundance with late age;  
150 four OTUs (OTU00023, OTU00045, OTU00063, and OTU00069) were positively correlated in  
151 abundance with middle age; and two OTUs (OTU00019 and OTU00033) were negatively correlated  
152 in abundance with middle age.

153

154 **OTUs that correlated with life events.** We also investigated OTUs associated with several life events,  
155 such as pregnancy, body weight, tumorigenesis, and cohousing, and compared them with the 17  
156 lifespan-associated OTUs.

157 Three mice (M3, M7, and Mo) underwent pregnancy/delivery during the experiment.  
158 Comparison of UniFrac distances between samples 20 days before pregnancy, during pregnancy, and  
159 after delivery in these mice revealed significant differences in unweighted UniFrac distance between  
160 any pair of three samples and in weighted UniFrac distance between before and during pregnancy  
161 samples and between before and after delivery samples (PERMANOVA,  $P < 0.05$ ; Extended Data

162 Fig.8A). The number of OTUs was not significantly different between the samples; however,  
163 Shannon's index was significantly increased in samples during pregnancy and after delivery compared  
164 to samples before pregnancy (Extended Data Fig. 8B). The analysis also revealed 59 OTUs with  
165 significant changes in abundance between samples (Table S4). These included four lifespan-associated  
166 OTUs (OTU00023, OTU00033, OTU00063, and OTU00076), which were significantly different  
167 before and after delivery.

168 We found that OTUs significantly correlated with body weight in samples collected from  
169 later stages of life from day 555 to just before death, and identified 27 OTUs significantly correlated  
170 in abundance with body weight ( $P < 0.05$ , average  $\rho > 0.3$ ; Extended Data Fig. 9). Of these, two  
171 OTUs (OTU00006 and OTU00045) were lifespan-associated OTUs; OTU00006 was negatively  
172 correlated whereas OTU00045 was positively correlated with body weight.

173 We observed tumors in five mice (M2, 6, 7, 8, and Mo) by immediate autopsy of the dead  
174 mice. UniFrac distance analysis of samples 30 days before death revealed that the gut microbiome  
175 significantly differed between samples with and without tumors (Extended Data Fig. 10A). Both the  
176 number of OTUs and Shannon's index were higher in the tumor samples than in the non-tumor samples  
177 (Extended Data Fig. 10B). We also identified 32 and 33 OTUs that were significantly enriched and  
178 depleted, respectively, in tumor samples compared to non-tumor samples (Table S5). Of these, five  
179 (OTU00006, OTU00012, OTU00013, OTU00035, and OTU00105) and two OTUs (OTU00041 and  
180 OTU00055) were lifespan-associated OTUs.

181 During the experiments, 10 mice (eight siblings and parents) were cohoused with different  
182 combinations of individuals in different frequencies and periods after initially cohousing all mice  
183 together for 51 days after birth (Extended Data Fig. 11). We divided the samples after 20 days into  
184 those with and without cohousing and compared their UniFrac distances. The results revealed that  
185 both weighted and unweighted UniFrac distances were significantly lower in housed samples than in  
186 non-housed samples (Extended Data Fig. 12).

187

188 **Overlap between the lifespan- and life events-associated OTUs.** As mentioned above, we identified  
189 17 lifespan-associated OTUs, 59 pregnancy-associated OTUs, 27 body weight-associated OTUs, and  
190 65 tumor-associated OTUs. These 168 OTUs were clustered to generate 127 OTUs specific to either  
191 of the four categories, and 29 and 6 OTUs overlapped with 2 and 3 host factors, respectively (Table.  
192 S6). Of the 17 lifespan-associated OTUs, 7 (41%) overlapped with tumors, four with pregnancy, and  
193 two with body weight.

194

## 195 **Discussion**

196 This is a comprehensive time-course study that elucidates the development of the gut microbiome over  
197 the lifespan of cognate SPF mice. The relationship between the gut microbiome and host aging has

198 been well recognized; however, it is mostly based on the comparative analysis of gut microbiomes  
199 between individuals of various ages with different dietary habits, lifestyles, and genetic backgrounds.  
200 In this study, we used sibling mice and longitudinally monitored changes in the gut microbiome of  
201 individuals from birth to death for approximately three years. Even though the mice were bred in a  
202 controlled environment, we eventually observed phenotypic diversity between individuals,  
203 accompanied by the development of the gut microbiome. As C57BL/6J mice were designed as an  
204 inbred line and have common genetic backgrounds, these diverse individual differences are likely  
205 caused by stochastic environmental factors.

206 In this study, we found, for the first time, a tendency for increased diversity of the gut  
207 microbiome before death by observing the variation in gut bacteria over the course of a lifetime in  
208 mice (Extended Data Fig. 2). Age-related gut microbiome transitions have been observed in several  
209 cohort studies; however, changes in gut microbial diversity in adults have been controversial<sup>19</sup>. Many  
210 studies in developed countries have suggested that the microbiota is relatively stable throughout  
211 adulthood, and that aging induces significant shifts in gut microbiome composition and function that  
212 are associated with a decline in diversity<sup>15,20</sup>. In contrast, another study targeting hunter-gatherers in  
213 Hadza reported an increase in microbial diversity in the older adult population<sup>21</sup>. The increase in  
214 diversity found in this study is consistent with the Hadza study. The older adults in the industrialized  
215 cohort might have been affected by a medical treatment such as antibiotics, whereas the increased  
216 diversity seen in mice in our study and the Hadza study could be due to the absence of the effect of  
217 medications. In the older adult population, a drop in immune fitness has been reported, accompanied  
218 by impaired hematopoiesis, higher susceptibility to infections, and reduced responses to vaccination<sup>22-</sup>  
219 <sup>28</sup>. Therefore, the increase in gut microbial diversity found in this study and the Hadza study suggests  
220 a relationship with immune weakening due to aging.

221 In the present study, the analysis of variation patterns of OTU abundance revealed nine  
222 distinct dynamic patterns of OTU abundance across the lifetime of seven siblings (Fig. 2). At  
223 approximately day 500–600, we also observed a significant change in the dynamics of OTUs in  
224 clusters 5 and 6. OTUs in cluster 5 decreased after day 500–600 whereas the dynamics of the ones in  
225 cluster 6 increased in the latter half of life. These results suggest that some mode changes related to  
226 the dynamics of the gut microbiota may have occurred around day 500–600; however, it is unclear  
227 whether this is due to changes in host homeostasis or the ecological balance of the gut microbiota.  
228 Additionally, our results suggest that some microbes persist for almost a lifetime in high abundance  
229 (Fig. 3); however, Caporaso et al. have suggested, based on two individual human time series analyses,  
230 that no core temporal microbiome exists at high abundance<sup>29</sup>. This discrepancy may be because the  
231 mice in our study were raised in a stable environment and were not affected by medication. Moreover,  
232 the bimodal distribution indicated that OTUs can be largely divided into “life-core” and “transient”  
233 OTUs. “Life-core” OTUs were largely dominated by Bacteroidetes whereas transient OTUs were



234 mostly composed of Firmicutes. These results are consistent with a study by Faith et al. reporting that  
235 Bacteroidetes and Actinobacteria are significantly more stable over time in humans<sup>34</sup>. Bacteroidetes  
236 and Firmicutes are both dominant phyla in gut microbiomes; however, our results indicated differences  
237 in their persistence throughout life. The Bacteroidetes group tends to persist for a long time whereas  
238 most of the Firmicutes group, although high in abundance, may be unable to persist. A previous report  
239 based on fluorescent in situ hybridization imaging technology showed that Bacteroidetes are mostly  
240 observed near the intestinal wall, whereas Firmicutes are separated from the gut wall in the mouse  
241 intestinal tract<sup>30</sup>. Therefore, the settling of Bacteroidetes in the gut wall may allow them to persist in  
242 the host. In addition to their location in the gut, Firmicutes have been proposed to be more effective  
243 in extracting energy from food than Bacteroidetes, thereby promoting more efficient absorption of  
244 calories and subsequent weight gain<sup>31,32</sup>. MacFarlane et al. reported that Bacteroidetes mainly produce  
245 acetate and propionate whereas Firmicutes produces more butyrate<sup>33</sup>. These differences in the  
246 metabolic capacity of Firmicutes and Bacteroidetes might also affect their persistence.

247 In the present study, we developed an original method to determine the dynamic relationship  
248 between the gut microbiome and lifespan at various times in life: a positive correlation in middle age  
249 (day 500–700) and a negative correlation in old age (after day 800) (Extended Data Fig.7). As many  
250 diseases have been reported to lower the diversity of gut bacteria<sup>35–37</sup>, it is often discussed that higher  
251 diversity is related to a healthier life. However, in this study, the average  $\alpha$ -diversity throughout life  
252 was not strongly correlated with the lifespan (Extended Data Fig. 7). Although higher diversity was  
253 correlated with a longer lifespan only in the middle period of life (day500~600), an opposite  
254 correlation was found in old age (after day 800). Moreover, the correlation between abundance and  
255 lifespan of OTUs before day 400 tended to be weaker than that in later life. We further found 17 OTUs  
256 that were strongly associated with lifespan, most of which were life-core OTUs (Fig. 4), although this  
257 correlation was altered or even reversed for many OTUs around day 500–600. Among the 17 lifespan-  
258 associated OTUs, *Lactobacillus* was negatively correlated with the middle period of life and showed  
259 a significant positive correlation later in life (after day 700). The abundance of *Lactobacillus* has been  
260 reported to decrease with age. Furthermore, an increase in *Lactobacillus* has been reported to be  
261 associated with lifespan elongation under limited calorie conditions in mice<sup>10</sup>. In our study, a  
262 consistent tendency was observed in aged mice but not in young mice. We also found that OTU33,  
263 which was closest to *B. vulgatus* (93.3%), showed a positive correlation with lifespan in later life but  
264 a negative correlation in early life (before day 500). *B. vulgatus* was reported to have a significantly  
265 higher abundance in village communities in Korea, where longevity is common<sup>38</sup>. This correlation  
266 between a higher abundance of *B. vulgatus* and longevity is consistent with our results in later life but  
267 not in early life. Additionally, immunosuppressive drug rapamycin and the anti-diabetic drug  
268 metformin, have recently been reported to extend the lifespan of mice related with gut microbiome<sup>3,39</sup>.  
269 In our study, the lifespan-associated OTUs included the genera *Bacteroides* and



270 Lactobacillus/Alistipes, which are known to be affected by rapamycin and metformin in mice,  
271 respectively. The change in correlation pattern with age suggest the possibility that the previously  
272 reported relationship between microbes and lifespan can also be a correlation found only at certain  
273 times in lifetimes.

274 In addition, some lifespan-associated OTUs were associated with pregnancy, body weight,  
275 and tumor development (Table S6). OTU00033 (*B. vulgatus* 93.02%) decreased after pregnancy and  
276 was negatively associated with longevity in young mice whereas OTU00023 (*C. fastidious* 83.44%),  
277 OTU00063 (*P. capillosus* 90.77%), and OTU00076 (*E. coprostanoligenes* 90.29%) increased after  
278 pregnancy, and were positively associated with longevity in young mice. Therefore, diversity  
279 increased with pregnancy, and higher diversity in youth was associated with longevity. Despite the  
280 limited number of mice in this study, these results indirectly suggest that pregnancy at a young age  
281 might be associated with longevity. Moreover, OTU00006 (*B. caecigallinarum* 90.16%) was  
282 negatively correlated with both body weight and longevity in old mice whereas OTU00045 (*P.*  
283 *timonensis* 87.9%) was positively correlated with both body weight and longevity (Table S6). These  
284 results indirectly suggest that weight gain in old age might be associated with longevity. Five OTUs  
285 (OTU00006, OTU00012, OTU00013, OTU00035, and OTU00105) enriched in tumor-developed  
286 mice were negatively associated with longevity in aged mice (Table S6). Additionally, diversity  
287 increased with tumor development, and higher diversity in aged mice was negatively associated with  
288 longevity. These results are consistent with the obvious conclusion that the absence of tumors in old  
289 age is associated with longevity.

290 In this study, for the first time, we characterized the life-core microbiome and showed that  
291 the temporal dynamics of some life-core OTUs are significantly correlated with lifespan. This study  
292 strongly suggests a close relationship between bacterial dynamics and lifespan. Further investigation  
293 of host immune changes or bacterial functional interactions will help clarify the mechanism underlying  
294 the temporal dynamics of diversity and bacterial abundance observed in this study.

295

## 296 **Methods**

297 **Fecal collection in mouse experiments.** Two SPF C57BL/6J mice were maintained and bred under  
298 specific pathogen-free conditions at RIKEN Center for Integrative Medical Sciences Animal Facility  
299 or conventional facility at Yokohama City University. (Kanagawa, Japan). Male and female offspring  
300 were separated after weaning for 50-51 days. The mouse cages were replaced primarily to control  
301 reproduction. The starting point of this study was the birth of the second generation of SPF mice. Each  
302 mouse in each group was recognized using ear punches. Nine offspring were born. All mice were kept  
303 in a room at  $23 \pm 2^\circ\text{C}$ ,  $50 \pm 10\%$  relative humidity, on a 12-h light/dark cycle. The animals were  
304 housed in cages (Extended Data Fig. 11) with wood shavings and fed (CE-2, CLEA Japan, Inc.) and

305 watered ad libitum. Male mouse (M1) was fed Oriental CMF (Oriental Yeast, Tokyo) from day 462-  
306 559 for breeding. One of the nice offspring died at 6 days of age and was therefore excluded from the  
307 analysis (M9). Another mouse (M6) was excluded from the analysis of the association of the gut  
308 microbiome with lifespan because it died during retention during sample collection due to debilitation.  
309 Mouse feces were collected, snap-frozen, and stored at  $-80^{\circ}\text{C}$ . All animal experiments were approved  
310 by the Institutional Animal Care and Use Committees of RIKEN Yokohama Branch and Yokohama  
311 City University.

312

313 **Autopsies of dead mice.** Dead mice were immediately stored in a freezer ( $-20^{\circ}\text{C}$ ). After thawing,  
314 they were dissected by a surgeon researcher, who visually checked the left and right kidneys, spleen,  
315 lungs, heart, cervical lymph nodes, ovaries, prostate, and liver for the presence of tumors.

316

317 **DNA extraction.** Bacterial genomic DNA was extracted from mouse feces using enzymatic lysis  
318 method. Frozen fecal pellets were thawed and suspended in 1 mL of TE10 (10 mM Tris-HCl, 10 mM  
319 EDTA) buffer containing RNaseA (final concentration of 100  $\mu\text{g}/\text{mL}$ ; Nippon Gene, Tokyo, Japan).  
320 Lysozyme (Sigma-Aldrich; St. Louis, MO, USA) was added at a final concentration of 15 mg/mL,  
321 and the suspension was incubated for 1 h at  $37^{\circ}\text{C}$  with gentle mixing. Purified achromopeptidase  
322 (Wako Pure Chemical, Osaka, Japan) was added at a final concentration of 2000 units/mL, and the  
323 suspension was further incubated for 30 min at  $37^{\circ}\text{C}$ . Sodium dodecyl sulfate (final concentration, 1  
324 mg/mL) and proteinase K (final concentration, 1 mg/mL; MERCK Group Japan, Tokyo, Japan) were  
325 added to the sample, and the mixture was incubated for 1 h at  $55^{\circ}\text{C}$ . DNA was extracted with  
326 phenol/chloroform/isoamyl alcohol (25:24:1), precipitated with isopropanol and 3 M sodium acetate,  
327 washed with 75% ethanol, and resuspended in 200  $\mu\text{L}$  of TE buffer. DNA was purified with a 20%  
328 PEG solution (PEG6000 in 2.5 M NaCl), pelleted by centrifugation, rinsed with 75% ethanol, and  
329 dissolved in TE buffer.

330

331 **16S rRNA gene amplicon sequencing.** In this study, we analyzed a total of 51.4 million (51,377,124  
332 reads) high-quality reads of the 16S rRNA gene V1-2 region from eight siblings and the parents  
333 (Supplementary Table 1). The isolated DNA (40 ng) was used for PCR amplification of the V1–V2  
334 hypervariable regions of the 16S rRNA gene using the universal primers 27Fmod (5'-  
335 AATGATACGGCGACCACCGAGATCTACACxxxxxxxxACACTCTTCCCTACACGACGCTC  
336 TTCCGATCTagrgttgatymtgctcag-3') and 338R (5'-  
337 CAAGCAGAAGACGGCATAACGATxxxxxxxxGTGACTGGAGTTCAGACGTGTGCTCTTCC  
338 GATCTtgetgcctcccgttaggt-3'), containing the Illumina Nextera adapter sequence and a unique 8-bp  
339 index sequence for each sample. Thermal cycling was performed on a 9700 PCR system (Life  
340 Technologies, Carlsbad, CA, USA) using Ex Taq polymerase (Takara Bio, Tokyo, Japan) with the

341 following cycling conditions: initial denaturation at 96 °C for 2 min; 25 cycles of denaturation at 96 °C  
342 for 30 s, annealing at 55° C for 45 s, and extension at 72 °C for 1 min; and final extension at 72 °C.  
343 All amplicons were purified using AMPure XP magnetic purification beads (Beckman Coulter, Brea,  
344 CA, USA) and quantified using the Quant-iT PicoGreen dsDNA Assay kit (Life Technologies). An  
345 equal amount of each PCR amplicon was mixed and subjected to sequencing with MiSeq (Illumina)  
346 using the MiSeq Reagent Kit v3 (600 cycles) according to the manufacturer's instructions.

347

348 **Data analysis.** After demultiplexing the 16S sequence reads based on a sample-specific index, paired-  
349 end reads were joined using the fastq-join program. Reads with average quality values <25 and inexact  
350 matches to the universal primer sequences were filtered; 3,000 reads that passed the quality filter were  
351 randomly selected from each sample and subjected to downstream analysis. The selected reads of all  
352 the samples were first sorted by the frequency of redundant sequences and grouped into operational  
353 taxonomic units (OTUs) using UCLUST (<https://www.drive5.com/>) with a sequence identity  
354 threshold of 97%. The taxonomic assignment of each operational taxonomic unit was determined by  
355 similarity searching against the Ribosomal Database Project and NCBI genome database using the  
356 GLSEARCH program.

357

358 **Temporal dynamics clusters analysis.**

359 Temporal dynamics clusters were calculated on the time-course data of OTU abundances. Bray-Curtis  
360 distance between the OTU abundances were calculated and hierarchically clustered by 'hclust'  
361 function R software program (v4.1.1) with 'ward.D2' method. The optimal number of clusters were  
362 calculated by 'find\_k' function from R library 'dendextend'.

363

364 **Statistical analysis.** All statistical analyses were conducted with the R software program (v4.1.1).  
365 Wilcoxon rank sum test was used for comparison of alpha diversities and the proportion of gut  
366 microbiome at the phylum, genus, and OTU levels. PERMANOVA was used to compare the gut  
367 microbiome structure among groups based on both weighted and unweighted UniFrac distance. P  
368 values were corrected for multiple testing using the Benjamin-Hochberg method as appropriate.

369 **Correlation analysis of the gut microbiome with lifespan.** In the correlation analysis of the gut  
370 microbiome structure and lifespan of the seven siblings, the variables (abundance of the bacteria/OTUs  
371 and diversity indices of communities) that were significantly correlated with lifespan were determined  
372 using the following five steps (Extended Data Fig. 6): (1) we calculated Spearman's correlation  
373 coefficients between lifespan and the variables of samples at each time point lifetime (days); (2) we  
374 calculated the moving average of the correlation coefficients of samples as it shifted every 50 days  
375 throughout the lifetime (see the trend of the entire period by taking the average of 50 days in shifts);  
376 (3) we developed a time series in which the sampling time is completely randomly switched, and the

377 moving average of the correlation was calculated in the same way; (4) we defined the range of possible  
378 values of the moving average of the correlation coefficients of the random time series (not strongly  
379 correlated with life expectancy at a particular time) calculated in step 3 in terms of the average value  
380 and the  $3\sigma$  range; and (5) finally, if the actual time series showed a moving average value that clearly  
381 deviates from the range defined in step 4, we considered it significant.

382

### 383 **Data availability**

384 The 16S rRNA V1–V2 region sequences analyzed in the current study were deposited in  
385 DDBJ/GenBank/EMBL under accession XXXXXXXX.

386

### 387 **Acknowledgements**

388 We thank K. Kaida, C. Shindo, J. Noack, M. Takagi, and M. Tanokura (RIKEN) for their technical  
389 support.

390 This work was supported by JSPS KAKENHI (Grant Number 21409803) and a RIKEN Integrated  
391 Symbiology grant (to M.H. and W.S.).

392

### 393 **Author contributions**

394 Experimental design, L.T. and W.S.; sampling and experiment, L. T., E.W., and T.U.; 16S rRNA  
395 sequencing, R.K., Y.O, Y.K., H.M.; Statistical analysis, L.T.; Writing—Original Draft, L.T.;  
396 Writing—Review & Editing, W.S., M.U., and M.H.; Supervision, W.S. and M.H.; Funding  
397 Acquisition, L.T., W.S., M.H.

398

### 399 **Competing interests**

400 The authors declare no competing interests.

401

### 402 **Figure legends**

403 **Fig. 1. Principle coordinate analysis (PCoA) based on UniFrac distance.**

404 **A**, PCoA of seven mice from day 0 to day 1044 of life-based on the weighted UniFrac distance. The  
405 color corresponds to the day after birth. **B**, PCoA of seven mice from day 0 to day 1044 based on the  
406 unweighted UniFrac distance. The color corresponds to the day after birth. **C**, PCoA of seven mice  
407 from day 20 to day 1044 based on the weighted UniFrac distance. Color corresponds to an individual  
408 mouse. **D**, PCoA of seven mice from day 20 to day 1044 based on the unweighted UniFrac distance.  
409 The color corresponds to an individual mouse.

410

411 **Fig. 2. The nine clusters of temporal operational taxonomic unit (OTU) dynamics.**

412 The average relative abundance of the OTUs included in each of the nine temporal dynamic clusters  
413 is shown. Temporal dynamics clusters were optimally determined based on average silhouette width  
414 (See Methods).

415

416 **Fig. 3. Life-core and transient microbiome.**

417 The upper figures are histograms of the observed frequency of the operational taxonomic units (OTUs)  
418 (maximum relative abundance  $\geq 0.1\%$ ). The observed frequency was calculated by dividing the  
419 number of times when an abundance of more than 0 reads was observed by the total number of  
420 observed times. The bar graphs below indicate the phylum-level composition of the OTUs in each bin.

421

422 **Fig. 4. Seventeen operational taxonomic units (OTUs) are significantly correlated with lifespan**  
423 **in mice.**

424 Spearman's correlation coefficients between the abundance of 17 lifespan-associated OTU and  
425 lifespans are shown. The orange dots indicate Spearman's correlation coefficient at each time point.  
426 The blue dots indicate the simple moving average of the coefficients over 50 time points. The yellow  
427 mesh indicates the confidence interval ( $3\sigma$ ).

428

429 **References**

- 430 1. Gordon, H. A., Bruckner-Kardoss, E. & Wostmann, B. S. Aging in germ-free mice: life tables  
431 and lesions observed at natural death. *J. Gerontol.* **21**, 380–387 (1966).
- 432 2. He, B. *et al.* Antibiotic-modulated microbiome suppresses lethal inflammation and prolongs  
433 lifespan in Treg-deficient mice. *Microbiome* **7**, 145 (2019).
- 434 3. Bitto, A. *et al.* Transient rapamycin treatment can increase lifespan and healthspan in middle-  
435 aged mice. *Elife* **5**, (2016).
- 436 4. Bárcena, C. *et al.* Healthspan and lifespan extension by fecal microbiota transplantation into  
437 progeroid mice. *Nat. Med.* **25**, 1234–1242 (2019).
- 438 5. Matsumoto, M., Kurihara, S., Kibe, R., Ashida, H. & Benno, Y. Longevity in mice is promoted  
439 by probiotic-induced suppression of colonic senescence dependent on upregulation of gut  
440 bacterial polyamine production. *PLoS One* **6**, e23652 (2011).
- 441 6. Cerro, E. D.-D. *et al.* Daily ingestion of *Akkermansia muciniphila* for one month promotes  
442 healthy aging and increases lifespan in old female mice. *Biogerontology* **23**, 35–52 (2022).
- 443 7. Fontana, L., Partridge, L. & Longo, V. D. Extending Healthy Life Span—From Yeast to Humans.  
444 *Science* (2010) doi:10.1126/science.1172539.
- 445 8. Rizza, W., Veronese, N. & Fontana, L. What are the roles of calorie restriction and diet quality  
446 in promoting healthy longevity? *Ageing Res. Rev.* **13**, 38–45 (2014).

- 447 9. Mercken, E. M., Carboneau, B. A., Krzysik-Walker, S. M. & de Cabo, R. Of mice and men: the  
448 benefits of caloric restriction, exercise, and mimetics. *Ageing Res. Rev.* **11**, 390–398 (2012).
- 449 10. Zhang, C. *et al.* Structural modulation of gut microbiota in life-long calorie-restricted mice. *Nat.*  
450 *Commun.* **4**, 2163 (2013).
- 451 11. Yatsunencko, T. *et al.* Human gut microbiome viewed across age and geography. *Nature* **486**,  
452 222–227 (2012).
- 453 12. Odamaki, T. *et al.* Age-related changes in gut microbiota composition from newborn to  
454 centenarian: a cross-sectional study. *BMC Microbiol.* **16**, 90 (2016).
- 455 13. Claesson, M. J. *et al.* Composition, variability, and temporal stability of the intestinal microbiota  
456 of the elderly. *Proc. Natl. Acad. Sci. U. S. A.* **108 Suppl 1**, 4586–4591 (2011).
- 457 14. Claesson, M. J. *et al.* Gut microbiota composition correlates with diet and health in the elderly.  
458 *Nature* **488**, 178–184 (2012).
- 459 15. Biagi, E. *et al.* Gut Microbiota and Extreme Longevity. *Curr. Biol.* **26**, 1480–1485 (2016).
- 460 16. Wu, L. *et al.* A Cross-Sectional Study of Compositional and Functional Profiles of Gut  
461 Microbiota in Sardinian Centenarians. *mSystems* **4**, (2019).
- 462 17. Rampelli, S. *et al.* Shotgun Metagenomics of Gut Microbiota in Humans with up to Extreme  
463 Longevity and the Increasing Role of Xenobiotic Degradation. *mSystems* **5**, (2020).
- 464 18. Si, J. *et al.* Long-term life history predicts current gut microbiome in a population-based cohort



- 465 study. *Nat Aging* (2022) doi:10.1038/s43587-022-00286-w.
- 466 19. Martino, C. *et al.* Microbiota succession throughout life from the cradle to the grave. *Nat. Rev.*  
467 *Microbiol.* (2022) doi:10.1038/s41579-022-00768-z.
- 468 20. Badal, V. D. *et al.* The gut microbiome, aging, and longevity: A systematic review. *Nutrients* **12**,  
469 3759 (2020).
- 470 21. Schnorr, S. L. *et al.* Gut microbiome of the Hadza hunter-gatherers. *Nat. Commun.* **5**, 3654 (2014).
- 471 22. Bosco, N. & Noti, M. The aging gut microbiome and its impact on host immunity. *Genes Immun.*  
472 **22**, 289–303 (2021).
- 473 23. Broxmeyer, H. E. *et al.* Fate of hematopoiesis during aging. What do we really know, and what  
474 are its implications? *Stem Cell Rev Rep* **16**, 1020–1048 (2020).
- 475 24. Kovtonyuk, L. V., Fritsch, K., Feng, X., Manz, M. G. & Takizawa, H. Inflamm-aging of  
476 hematopoiesis, hematopoietic stem cells, and the bone marrow microenvironment. *Front.*  
477 *Immunol.* **7**, 502 (2016).
- 478 25. Goronzy, J. J. & Weyand, C. M. Understanding immunosenescence to improve responses to  
479 vaccines. *Nat. Immunol.* **14**, 428–436 (2013).
- 480 26. Thomas, R., Wang, W. & Su, D.-M. Contributions of age-related thymic involution to  
481 immunosenescence and inflammaging. *Immun. Ageing* **17**, 2 (2020).
- 482 27. Cianci, R. *et al.* The interplay between immunosenescence and Microbiota in the efficacy of

- 483 vaccines. *Vaccines (Basel)* **8**, 636 (2020).
- 484 28. Amsterdam, D. & Ostrov, B. E. The impact of the microbiome on immunosenescence. *Immunol.*  
485 *Invest.* **47**, 801–811 (2018).
- 486 29. Caporaso, J. G. *et al.* Moving pictures of the human microbiome. *Genome Biol.* **12**, R50 (2011).
- 487 30. Earle, K. A. *et al.* Quantitative Imaging of Gut Microbiota Spatial Organization. *Cell Host*  
488 *Microbe* **18**, 478–488 (2015).
- 489 31. Krajmalnik-Brown, R., Ilhan, Z.-E., Kang, D.-W. & DiBaise, J. K. Effects of gut microbes on  
490 nutrient absorption and energy regulation. *Nutr. Clin. Pract.* **27**, 201–214 (2012).
- 491 32. Magne, F. *et al.* The Firmicutes/Bacteroidetes Ratio: A Relevant Marker of Gut Dysbiosis in  
492 Obese Patients? *Nutrients* **12**, (2020).
- 493 33. Fei, N. & Zhao, L. An opportunistic pathogen isolated from the gut of an obese human causes  
494 obesity in germfree mice. *ISME J.* **7**, 880–884 (2013).
- 495 34. Faith, J. J. *et al.* The Long-Term Stability of the Human Gut Microbiota. *Science* (2013)  
496 doi:10.1126/science.1237439.
- 497 35. Kriss, M., Hazleton, K. Z., Nusbacher, N. M., Martin, C. G. & Lozupone, C. A. Low diversity  
498 gut microbiota dysbiosis: drivers, functional implications and recovery. *Curr. Opin. Microbiol.*  
499 **44**, 34–40 (2018).
- 500 36. Brown, K., DeCoffe, D., Molcan, E. & Gibson, D. L. Diet-induced dysbiosis of the intestinal

- 501 microbiota and the effects on immunity and disease. *Nutrients* **4**, 1095–1119 (2012).
- 502 37. Mosca, A., Leclerc, M. & Hugot, J. P. Gut Microbiota Diversity and Human Diseases: Should  
503 We Reintroduce Key Predators in Our Ecosystem? *Front. Microbiol.* **7**, 455 (2016).
- 504 38. Park, S.-H. *et al.* Comparative analysis of gut microbiota in elderly people of urbanized towns  
505 and longevity villages. *BMC Microbiol.* **15**, 49 (2015).
- 506 39. Induri, S. N. R. *et al.* The Gut Microbiome, Metformin, and Aging. *Annu. Rev. Pharmacol.*  
507 *Toxicol.* **62**, 85–108 (2022).

**A**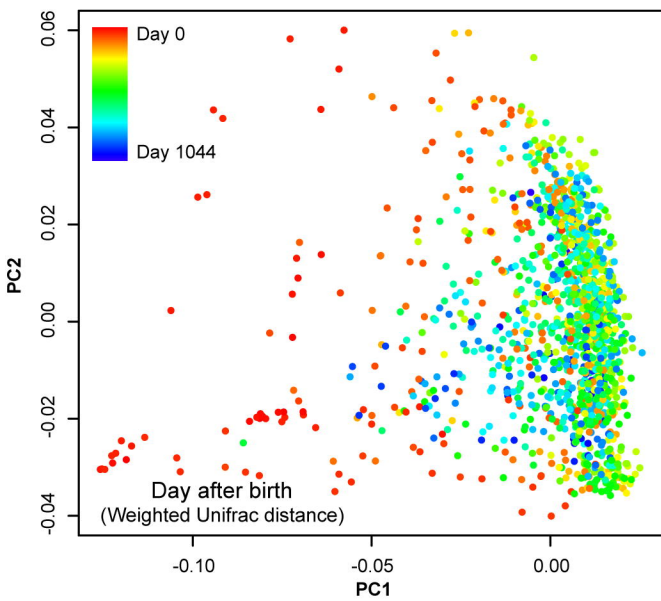**B**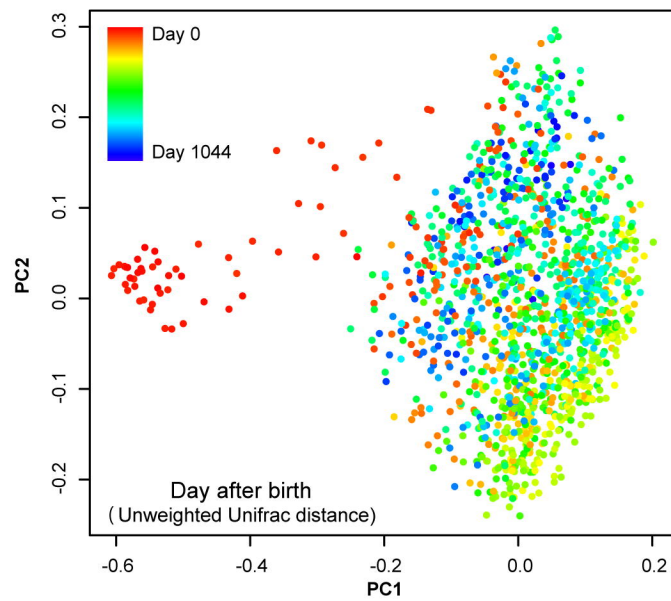**C**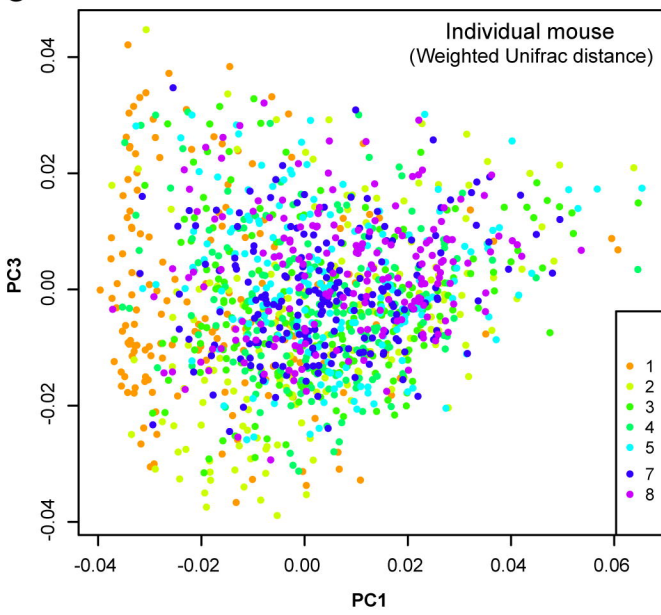**D**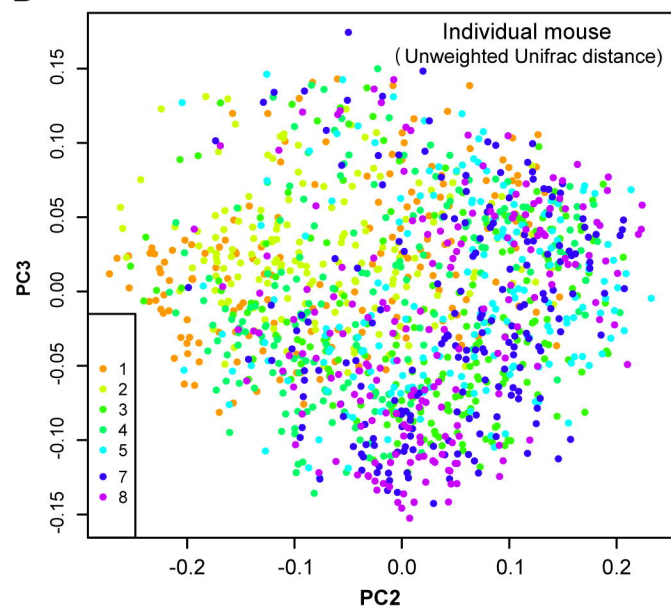

**Relative abundance**

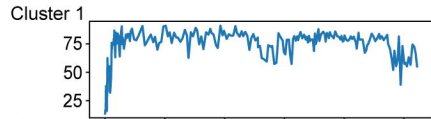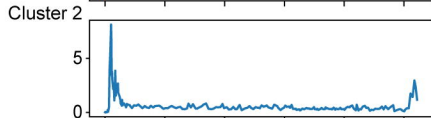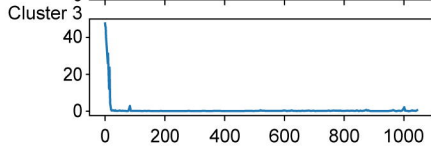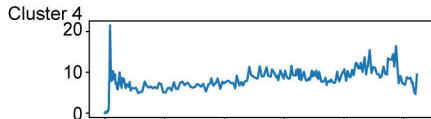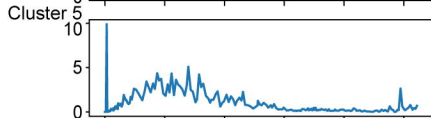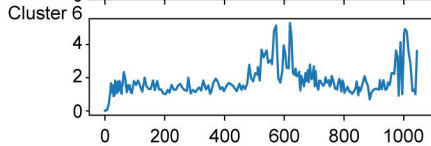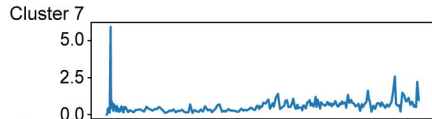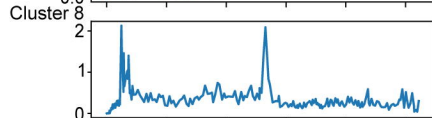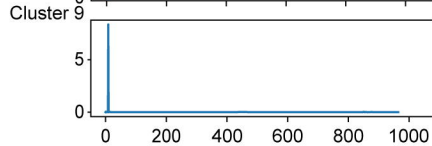

**Lifetime (days)**

**A**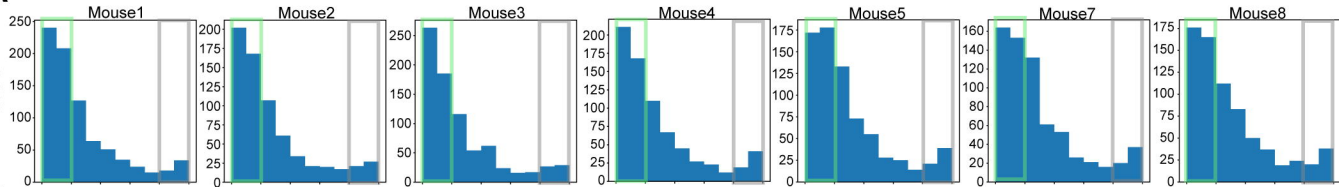**B**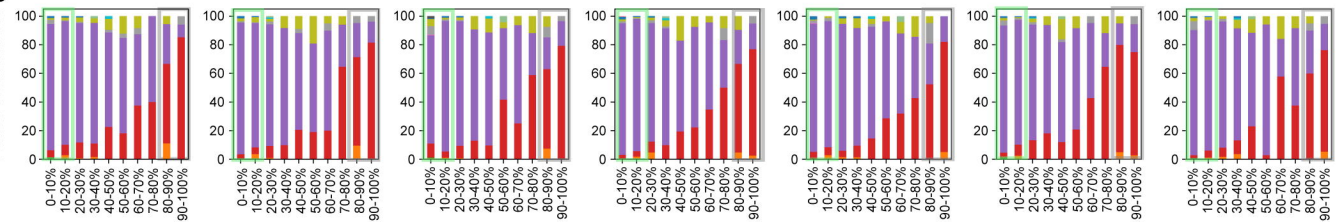

Transient microbiome

Life-core microbiome

Acidobacteria TM7 Streptophyta Bacteroidetes Firmicutes Cyanobacteria Spirochaetes  
 Proteobacteria Actinobacteria Deferribacteres Tenericutes Verrucomicrobia Fusobacteria UNDEFINED

Observed Frequency



Spearman's correlation coefficient

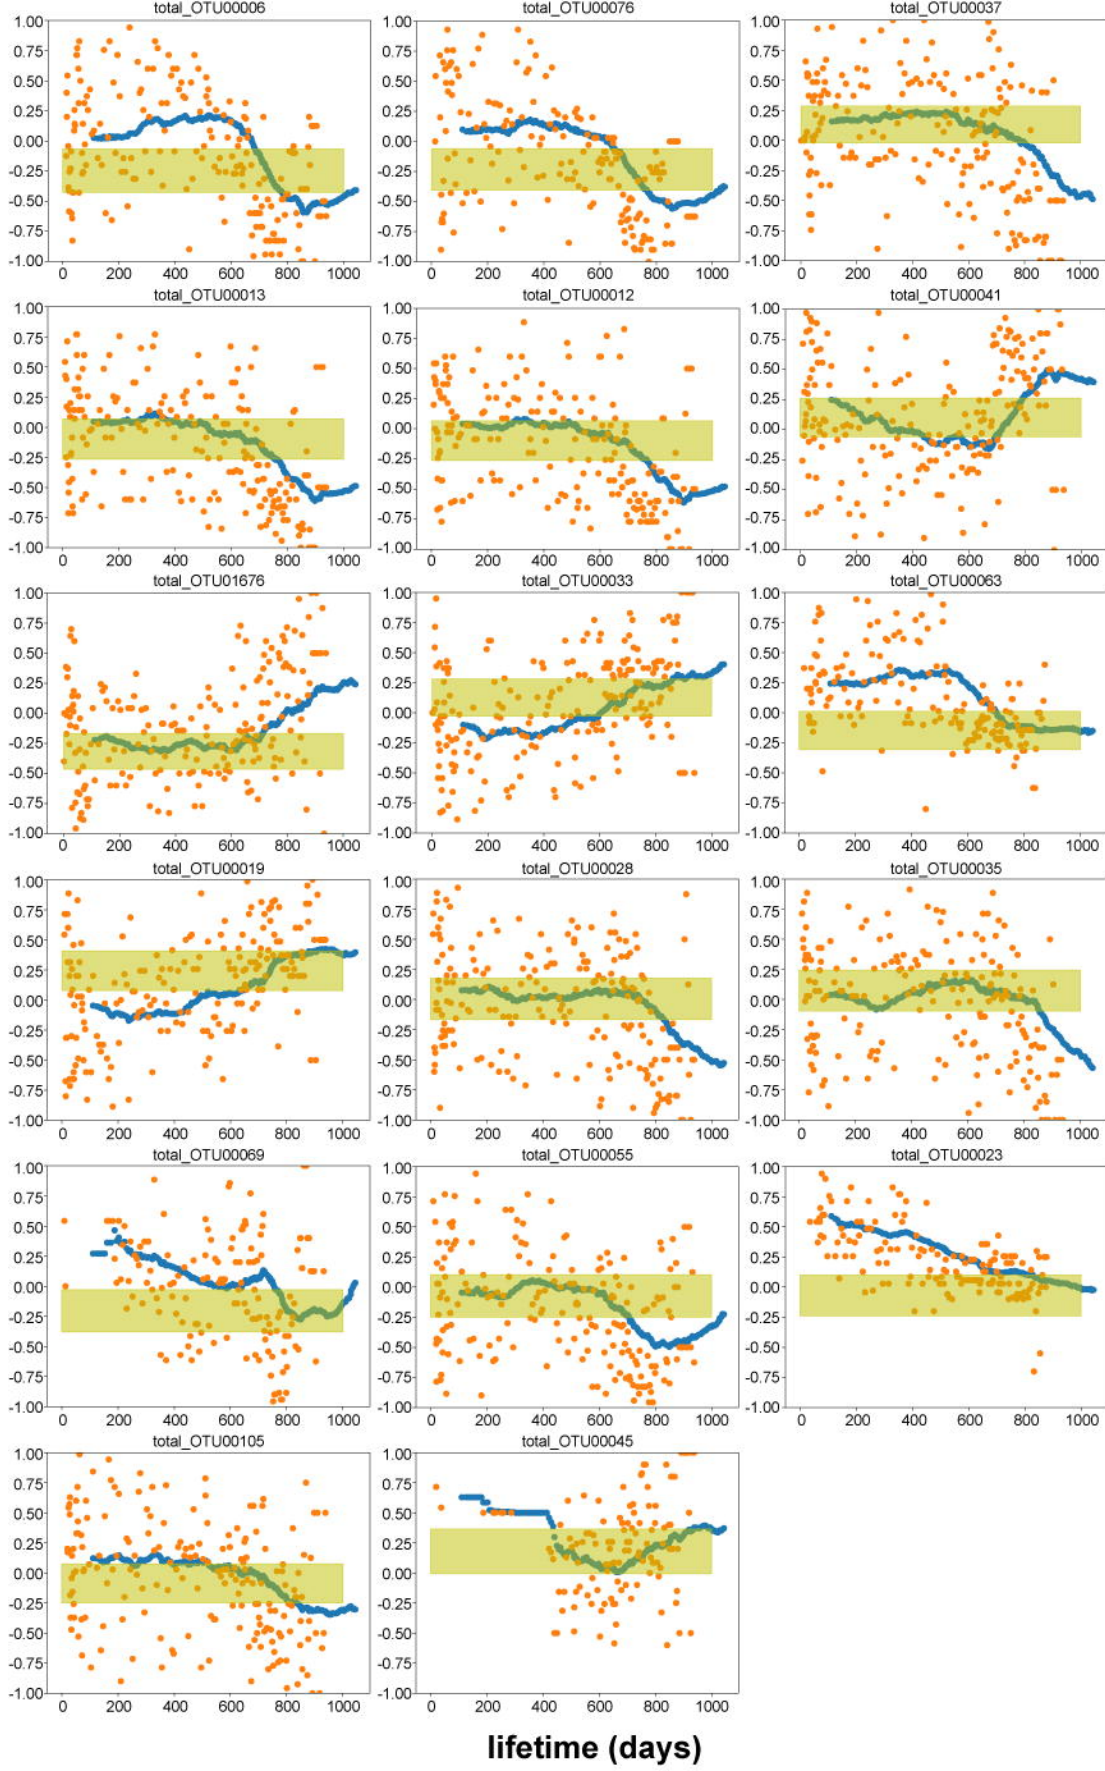

Source: https://www.biorxiv.org/content/10.1101/2022.11.07.515511.full.pdf
